# Supplementary material for: Identifying opportunities for transboundary conservation in Africa
Source: Frontiers journal article supplement (doi:10.3389/fcosc.2023.1237849), 2023-08-24
Supplement: Data_Sheet_1.docx [file Data_Sheet_1.docx]

Supplementary Material

# Supplementary Figures


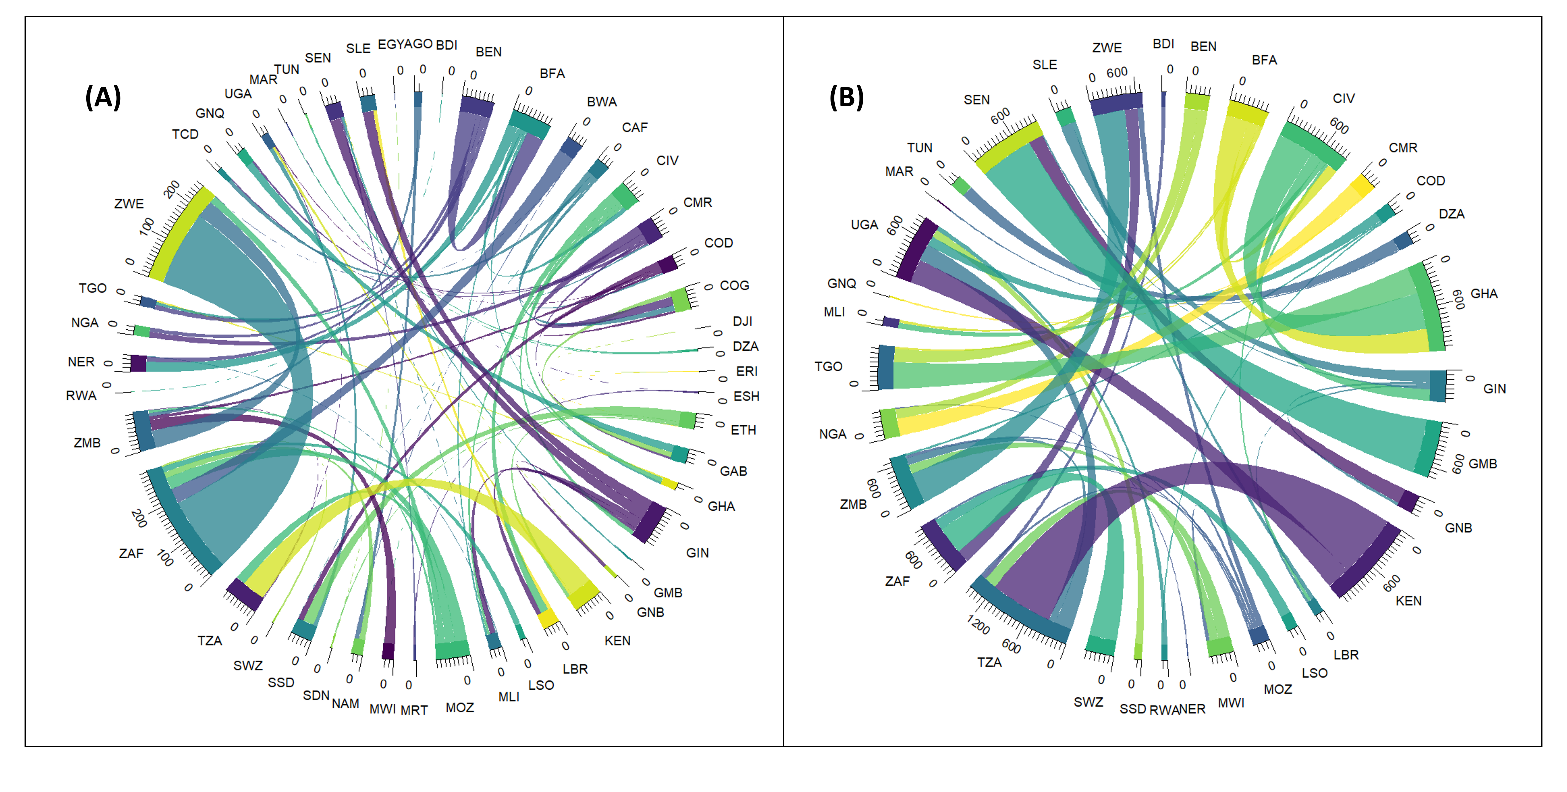


**Supplementary Figure 1.** The number of potential TBCAs between different countries (with ISO3 codes labelled). A) groups 1-4 (maintaining connectivity). B) group 5-6 (enhancing connectivity), pairs of countries with <15 potential TBCAs between them were excluded from this figure (B). Colours are only for clarity of visualisation.

**Supplementary Table 1.** Existing TBCAs in Africa

| **Transboundary protected area name** | **Countries** | **Status** | **Year** | **Source** | **Link to more info** |
| --- | --- | --- | --- | --- | --- |
| /Ai /Ais-Richtersveld Transfrontier Park | Namibia; South Africa | Designated | 2013 | SADC TFCA portal | https://tfcaportal.org/node/112 |
| Chimanimani TFCA | Mozambique; Zimbabwe | Designated | NA | SADC TFCA portal | https://tfcaportal.org/node/437 |
| Great Limpopo Transfrontier Park | Mozambique; Zimbabwe; South Africa | Designated | 2002 | SADC TFCA portal | https://tfcaportal.org/node/23 |
| Greater Mapungubwe Transfrontier Conservation Area | Botswana; South Africa; Zimbabwe | MoU signed | 2009 | SADC TFCA portal | https://tfcaportal.org/node/25 |
| Iona-Skeleton Coast Transfrontier Conservation Area | Angola; Namibia | Designated | 2003 (MoU signed) | SADC TFCA portal | https://tfcaportal.org/node/404 |
| Kavango Zambezi Transfrontier Conservation Area (KZTFCA) TREATY | Angola; Namibia; Botswana; Zambia; Zimbabwe | Designated | 2011 | SADC TFCA portal | https://tfcaportal.org/node/51 |
| Kgalagadi Transfrontier Park | Botswana; South Africa | Designated | 2000 | SADC TFCA portal | https://tfcaportal.org/node/24 |
| Lubombo Transfrontier Conservation and Resource Area | Mozambique; South Africa; Eswatini | Designated | 2000 | SADC TFCA portal | https://tfcaportal.org/node/22 |
| Malawi - Zambia Transfrontier Conservation Area | Malawi; Zambia | Designated | 2015 | SADC TFCA portal | https://tfcaportal.org/node/27 |
| Maloti-Drakensberg Transfrontier Conservation and Development Area | Lesotho; South Africa | MoU signed | 2001 | SADC TFCA portal | https://tfcaportal.org/node/26 |
| Mayombe Forest Transfrontier Conservation Area | Angola; Democratic Republic of Congo; Gabon; Republic of Congo | MoU signed | 2009 | SADC TFCA portal | https://www.tfcaportal.org/node/438 |
| Proposed Niassa-Selous Transfrontier Conservation Area | Mozambique; Tanzania | MoU signed | 2007 | SADC TFCA portal | https://www.tfcaportal.org/node/441 |
| Tri-National de la Sangha | Republic of Congo; Central African Republic; Cameroon | Designated | 2000 | 2007 pdf inventory | https://fondationtns.org/en/ |
| Kidepo | South Sudan; Uganda | Designated | NA | 2007 pdf inventory | https://rmportal.net/library/content/global-conservation-program/gcp-closeout-reports/conservation-landscape-for-peace-sustaining-wildlife-and-community-livelihoods-inthe-southern-sudan-northern-uganda-transboundary-landscape/at_download/file |
| The Virunga Volcanoes Transboundary Conservation Area | Democratic Republic of Congo; Rwanda; Uganda | Designated | 2004 | 2007 pdf inventory | https://greatervirunga.org/the-treaty/ |
| Victoria Falls | Zambia; Zimbabwe | Designated | NA | IUCN 2001 TB report | https://portals.iucn.org/library/efiles/documents/PAG-007.pdf |
| Kilimanjaro | Kenya; Tanzania | Designated | NA | 2007 pdf inventory | https://www.researchgate.net/publication/326513752_Transboundary_Conservation_Areas_in_African_Mountains_Opportunities_and_Challenges_for_Addressing_Global_Change |
| W-Arly-Pendjari Complex | Benin; Burkina Faso; Niger | Designated | 2017 | UNESCO World Heritage Convention | https://whc.unesco.org/en/list/749/ |
| Central Albertine Rift Transboundary Protected Area Network | Rwanda; Democratic Republic of Congo; Uganda | MoU signed | 2006 | World Conservation Society | https://albertinerift.wcs.org/Initiatives/Transboundary-Conserv.aspx |
| Sena Oura-Bouba Ndjija Bi-National | Cameroon; Chad | MoU signed | 2011 | Congo Basin Forest Partnership | https://archive.pfbc-cbfp.org/news_en/items/Accord_Tchad_-_Cameroun-_Complexe_transfrontalier_sena-Bouba-EE.html |
| Mengamé-Minkébé Transboundary Gorilla Sanctuary (MMGS) | Cameroon; Gabon | MoU signed | 2001 | International Tropical Timber Organization | https://www.itto.int/project/id/PD066_01-Rev.1-F |
| Mount Nimba Strict Nature Reserve | Guinea; Côte d’Ivoire | Designated | 1981 | UNESCO World Heritage Convention | https://whc.unesco.org/en/list/155 |
| Complexe Transfrontalier Lac Télé - Grands Affluents - Lac Tumba | Congo; Democratic Republic of Congo | MoU signed | 2017 | Ramsar Convention | https://www.informea.org/en/transboundary-ramsar-site-complexe-transfrontalier-lac-t%C3%A9l%C3%A9-grands-affluents-lac-tumba-congo |
| Niumi-Saloum | Gambia; Senegal | MoU signed | 2008 | Ramsar Convention | https://www.informea.org/en/transboundary-ramsar-site-niumi-saloum-gambia-senegal-2008-senegal-instrument |
| Delta du Fleuve Senegal Transboundary Biosphere Reserve | Mauritania; Senegal | Designated | 2012 | UNESCO | https://en.unesco.org/biosphere/africa/delta-fleuve-senegal |
| Mono Transboundary Biosphere Reserve | Benin; Togo | Designated | 2017 | UNESCO | https://en.unesco.org/biosphere/africa/mono |
| Gola Transboundary Peace Park | Liberia; Sierra Leone | MoU signed | 2009 | UNEP; Mittermeier et al. (2005) | https://www.unep.org/news-and-stories/story/gola-rainforest-national-park-unep-welcomes-opening-sierra-leones-second |
